# Supplementary material
Source: PubMed Central journal article supplement (PMC6731372)
Supplement: mmc1.pdf [file mmc1.pdf]

**The American Journal of Human Genetics, Volume 105**

**Supplemental Data**

**Harmonizing Clinical Sequencing and Interpretation  
for the eMERGE III Network**

**The eMERGE Consortium**

Figure S1.

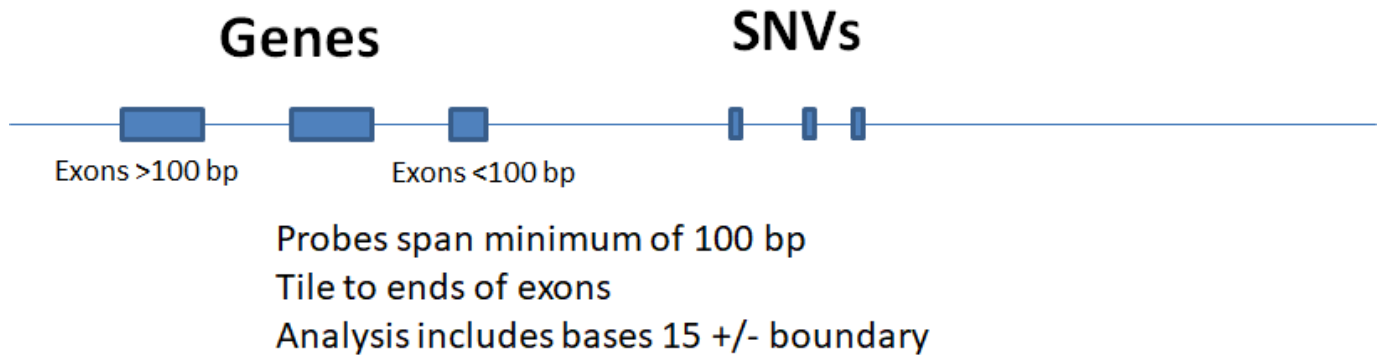

Figure S1. Capture design strategies. Probes were designed to capture targeted regions of the eMERGESeq panel according to the certain criteria that include but are not limited to those shown in the figure.

Figure S2.

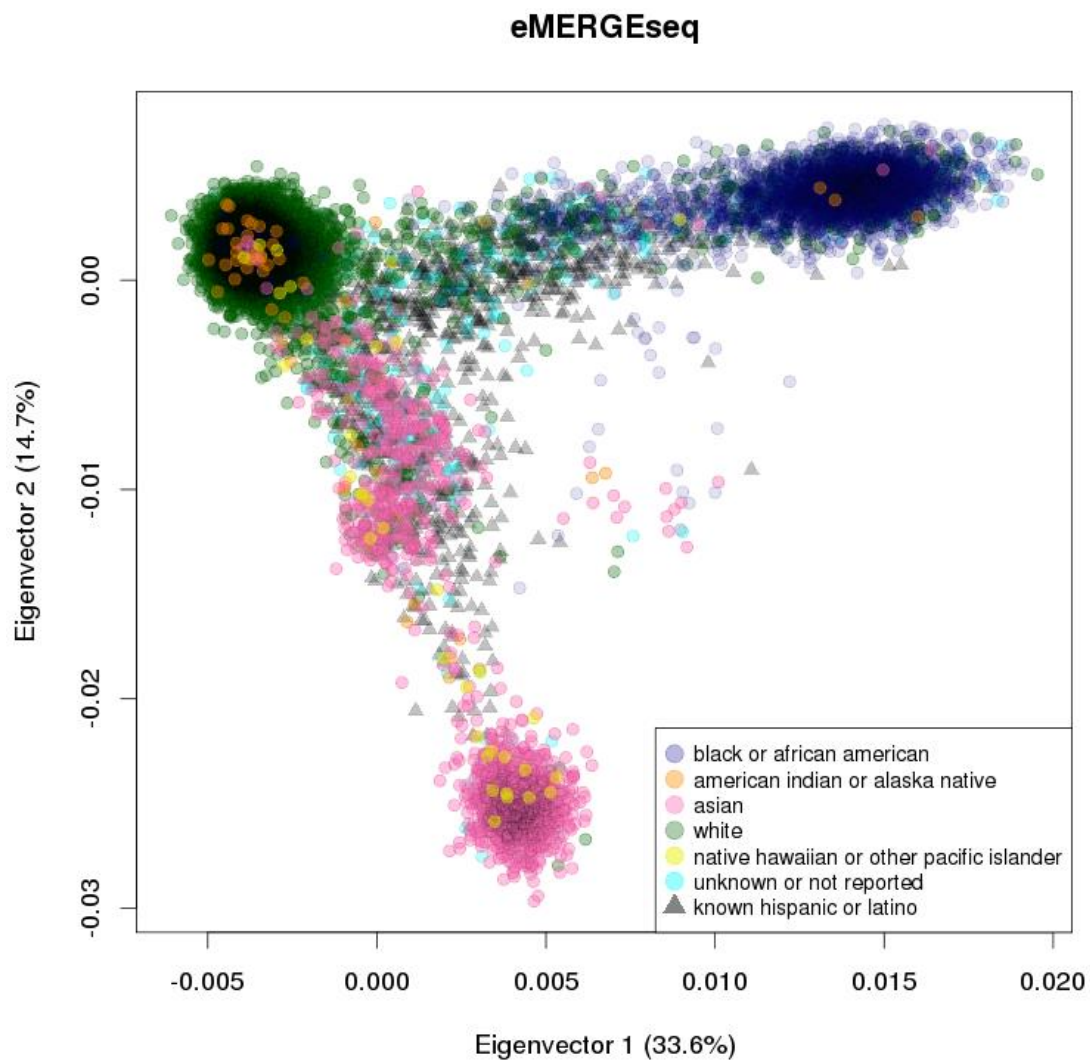

Figure S2. PCA plot of genetic ancestry for the eMERGEseq cohort.

Table S2. Capture design performance comparison between both sequencing centers before and after design optimization (Version 1 vs. Validated Panel).

|                                                                                                                   | Broad/LMM          |                                                                                                                                                                                                                       | Baylor             |                                                                                                                                                                                                                                                  |
|-------------------------------------------------------------------------------------------------------------------|--------------------|-----------------------------------------------------------------------------------------------------------------------------------------------------------------------------------------------------------------------|--------------------|--------------------------------------------------------------------------------------------------------------------------------------------------------------------------------------------------------------------------------------------------|
|                                                                                                                   | Version 1<br>Panel | Validated Panel (v2)                                                                                                                                                                                                  | Version 1<br>Panel | Validated Panel (v2)                                                                                                                                                                                                                             |
| % of Bases ≥20X                                                                                                   | 99.30%             | 99.80%                                                                                                                                                                                                                | 99.80%             | 99.90%                                                                                                                                                                                                                                           |
| Number of bases <20X in<br>≥10% of samples                                                                        | 3,364              | 732                                                                                                                                                                                                                   | 1,332              | 475                                                                                                                                                                                                                                              |
| Gene_Exon with bases <20X<br>in validated panel (% of bases<br>in that exon <20X)                                 | n/a                | <i>CACNA1A_Exon42</i> (100%)<br><i>TGFBR1_Exon01</i> (100%)<br><i>KCNQ1_Exon01</i> (44.5%)<br><i>RYR1_Exon91</i> (22.4%)<br><i>CACNA1B_Exon01</i> (19.4%)<br><i>CACNA1B_Exon19</i> (7.6%)<br><i>RB1_Exon09</i> (2.6%) | n/a                | <i>SDHD_Exon04</i> (100%)<br><i>CHEK2_Exon14</i> (100%)<br><i>TGFBR1_Exon01</i> (39.8%)<br><i>PKP2_Exon09</i> (14.3%)<br><i>COL5A1_Exon01</i> (11.8%)<br><i>RYR1_Exon91</i> (10.6%)<br><i>APOB_Exon29</i> (8.4%)<br><i>CACNA1B_Exon19</i> (6.4%) |
| SNV with <20X                                                                                                     | n/a                | rs25531<br>rs25532<br>rs1135840<br>rs1702294                                                                                                                                                                          | n/a                | rs657452<br>rs6002655<br>rs8066602<br>rs8066731<br>rs35445101                                                                                                                                                                                    |
| SNVs determined by eMerge<br>Annotation group to be<br>clinically actionable (14) that<br>have low or no coverage | n/a                | None                                                                                                                                                                                                                  | n/a                |                                                                                                                                                                                                                                                  |
| ClinVar Pathogenic/Likely<br>pathogenic variants with<br>low/missing coverage                                     | n/a                | rs199473441 <sup>a</sup><br>rs397508096 <sup>c</sup><br>rs794728563 <sup>a</sup><br>rs794728544 <sup>a</sup><br>rs199472884 <sup>a,b</sup>                                                                            | n/a                | None                                                                                                                                                                                                                                             |

<sup>a</sup>single submitter for 'pathogenic' classification; <sup>b</sup> multiple submitters for 'likely pathogenic'; <sup>c</sup> multiple submitters for 'pathogenic'

Table S2. Comparison before and after design optimization (Version 1 vs. Validated Panel). While each design has unique strengths and deficiencies, the percent bases  $\geq 20X$  coverage is greater than 99% for both sequencing sites.

Table S3. Summary of PGx report contents from sequencing centers to sites

| <b>Genes</b>  | <b># Variants Genotyped</b> | <b>Haplotypes or *Alleles Reported</b> | <b>Phenotypes Reported</b>                                   | <b>Associated Drugs</b>                                                                | <b>Reporting differences between SCs</b>                                                                                                                                                                 | <b>CPIC Publications</b>                                                                                                 |
|---------------|-----------------------------|----------------------------------------|--------------------------------------------------------------|----------------------------------------------------------------------------------------|----------------------------------------------------------------------------------------------------------------------------------------------------------------------------------------------------------|--------------------------------------------------------------------------------------------------------------------------|
| <i>TPMT</i>   | 4                           | *1, *2, *3A, *3B, *3C, *4              | TPMT<br>Normal,<br>Intermediate,<br>or Poor<br>Metabolizer   | Azathioprine,<br>Mercaptopurine,<br>Thioguanine<br>(thiopurines,<br>immunosuppressant) | None                                                                                                                                                                                                     | Relling et al. 2011<br>PMID 21270794;<br>Relling et al. 2013<br>PMID 23422873                                            |
| <i>CYP2C9</i> | 2                           | *1, *2, *3                             | CYP2C9<br>Normal,<br>Intermediate,<br>or Poor<br>Metabolizer | Warfarin<br>(anticoagulant),<br>Phenytoin/fosphenytoin<br>(anticonvulsant)             | BCM-HGS<br>reported CYP2C9<br>and VKORC1<br>together for<br>warfarin only<br>given that the<br>phenytoin dosage<br>guidelines rely on<br>the HLA-B allele,<br>which is not<br>assessed in this<br>assay. | Johnson et al. 2011<br>PMID: 21900891,<br>Johnson et al. 2017<br>PMID: 28198005;<br>Caudle et al. 2014<br>PMID: 25099164 |
| <i>VKORC1</i> | 1                           | c.-1639G>A<br>(rs9923231)              | VKORC1<br>Normal,<br>Intermediate<br>or Low<br>Expression    | Warfarin (anticoagulant)                                                               | None                                                                                                                                                                                                     | Johnson et al. 2011<br>PMID: 21900891,<br>Johnson et al. 2017<br>PMID: 28198005                                          |
| <i>IFNL3</i>  | 1                           | c.-3180G>A<br>(rs12979860)             | IFNL3<br>Favorable or<br>Unfavorable                         | PEG-IFN- $\alpha$ , Ribavirin<br>(antiviral)                                           | None                                                                                                                                                                                                     | Muir et al. 2014<br>PMID: 24096968                                                                                       |

|                |   |                                                 | Response                                                                               |                                                                                                                                                                                                                                                                                           |                                                                                                                                                                      |                                                                                                                                                                                                                                                   |
|----------------|---|-------------------------------------------------|----------------------------------------------------------------------------------------|-------------------------------------------------------------------------------------------------------------------------------------------------------------------------------------------------------------------------------------------------------------------------------------------|----------------------------------------------------------------------------------------------------------------------------------------------------------------------|---------------------------------------------------------------------------------------------------------------------------------------------------------------------------------------------------------------------------------------------------|
| <i>DPYD</i>    | 3 | *1, *2A, *13,<br>c.2846A>T                      | DPYD<br>Normal,<br>Intermediate,<br>or Poor<br>Metabolizer                             | 5-Fluorouracil,<br>Capecitabine, Tegafur <sup>a</sup><br>(fluoropyrimidines,<br>antineoplastic)                                                                                                                                                                                           | None                                                                                                                                                                 | Caudle et al. 2013<br>PMID: 23988873                                                                                                                                                                                                              |
| <i>SLCO1B1</i> | 1 | *1A, *5<br>(c.521T>C;<br>rs4149056)             | SLCO1B1<br>Normal,<br>Decreased, or<br>Poor Function                                   | Simvastatin (cholesterol<br>reduction)                                                                                                                                                                                                                                                    | None                                                                                                                                                                 | Wilke et al. 2012<br>PMID: 22617227,<br>Ramsey et al. 2014<br>PMID: 24918167                                                                                                                                                                      |
| <i>CYP2C19</i> | 8 | *1, *2, *3, *4A,<br>*4B, *5, *6, *7,<br>*8, *17 | CYP2C19<br>Ultrarapid,<br>Rapid,<br>Normal,<br>Intermediate,<br>or Poor<br>Metabolizer | Clopidogrel<br>(antiplatelet);<br>Voriconazole<br>(antifungal);<br>Amitriptyline,<br>Clomipramine, Doxepin,<br>Imipramine,<br>Trimipramine (tricyclic<br>antidepressants or<br>TCAs); Citalopram,<br>Escitalopram, Sertraline<br>(selective serotonin<br>reuptake inhibitors or<br>SSRIs) | Clomipramine,<br>Doxepin,<br>Imipramine,<br>Trimipramine,<br>Sertraline are<br>CPIC level B;<br>BCM-HGSC only<br>reported CPIC<br>level A gene/drug<br>combinations. | Scott et al. 2011<br>PMID: 21716271,<br>Scott et al. 2013<br>PMID: 23698643;<br>Moriyama et al.<br>2016 PMID:<br>27981572; Hicks et<br>al. 2013 PMID:<br>23486447, Hicks et<br>al. 2016 PMID:<br>27997040; Hicks et<br>al. 2015 PMID:<br>25974703 |

<sup>a</sup>Tegafur/DPYD had a CPIC level A when PGx report was implemented. It was since lowered to a level C

Table S4. The 39 preferred indication terms and codes for the eMERGE III network.

| Preferred indication term                                   | Code                                                                                                   |
|-------------------------------------------------------------|--------------------------------------------------------------------------------------------------------|
| Abnormal sex determination                                  | EMERGE-GIS-LOCAL 10102-6 (abnormal sex determination)                                                  |
| Abnormality of pain sensation                               | EMERGE-GIS-LOCAL 10103-5 (abnormality of pain sensation)                                               |
| Abnormality of the heart valves                             | EMERGE-GIS-LOCAL 10104-4 (abnormality of the heart valves)                                             |
| Adult Migraine                                              | EMERGE-GIS-LOCAL 10099-1 (adult migraine)                                                              |
| Amyloidosis, Hereditary, Transthyretin-Related              | MIM 105210 (transthyretin amyloidosis)                                                                 |
| Arrhythmia                                                  | MESH D001145 (arrhythmias, cardiac)                                                                    |
| Ascending aortic dilation / Aneurysm                        | EMERGE-GIS-LOCAL 10106-2 (ascending aortic dilation / aneurysm)                                        |
| Asthma                                                      | DOID 2841 (asthma)                                                                                     |
| Atopic dermatitis                                           | DOID 3310 (atopic dermatitis)                                                                          |
| Autistic behavior                                           | EMERGE-GIS-LOCAL 10109-9 (autistic behavior)                                                           |
| Autoimmunity                                                | EMERGE-GIS-LOCAL 10110-7 (autoimmunity)                                                                |
| Bipolar affective disorder                                  | DOID 3312 (bipolar disorder)                                                                           |
| Breast carcinoma                                            | DOID 3459 (breast carcinoma)                                                                           |
| Cardiomyopathy                                              | ORPHA 167848 (cardiomyopathy)                                                                          |
| Chronic kidney disease                                      | MESH D051436 (renal insufficiency, chronic)                                                            |
| Chronic sinusitis                                           | EMERGE-GIS-LOCAL 10111-6 (chronic sinusitis)                                                           |
| Cirrhosis                                                   | DOID 5082 (liver cirrhosis)                                                                            |
| Colorectal Cancer / Polyps                                  | EMERGE-GIS-LOCAL 10126-0 (colorectal cancer / polyps)                                                  |
| Congestive heart failure                                    | DOID 6000 (congestive heart failure)                                                                   |
| Coronary artery disease                                     | DOID 3393 (coronary artery disease)                                                                    |
| Depression                                                  | EMERGE-GIS-LOCAL 10128-8 (depression)                                                                  |
| Ehlers-Danlos Syndrome                                      | ORPHA 98249 (ehlers-danlos syndrome)                                                                   |
| Familial hypercholesterolemia                               | EMERGE-GIS-LOCAL 10134-1 (familial hypercholesterolemia)<br>MIM 143890 (familial hypercholesterolemia) |
| Healthy                                                     | EMERGE-GIS-LOCAL 10094-6 (healthy)                                                                     |
| Hyperammonemia due to ornithine transcarbamylase deficiency | MIM 311250 (ornithine carbamoyl transferase deficiency)                                                |
| Hyperlipidemia                                              | MESH D006949 (hyperlipidemias)                                                                         |
| Hypertriglyceridemia                                        | MESH D015228 (hypertriglyceridemia)                                                                    |
| Intellectual disability                                     | DOID 1059 (intellectual disability)                                                                    |
| Not selected for trait                                      | EMERGE-GIS-LOCAL 10093-7 (not selected for trait)                                                      |
| Obesity                                                     | DOID 9970 (obesity)                                                                                    |
| Opioid dependence, Neonatal abstinence                      | EMERGE-GIS-LOCAL 10100-8 (opioid dependence, neonatal abstinence)                                      |
| Ovarian Cancer, epithelial included                         | ORPHA 213500 (ovarian cancer)                                                                          |
| Pediatric Migraine                                          | EMERGE-GIS-LOCAL 10101-7 (pediatric migraine)                                                          |
| Pulmonary Hypertension                                      | ORPHA 422 (primary pulmonary hypertension)                                                             |
| Rheumatoid arthritis                                        | DOID 7148 (rheumatoid arthritis)                                                                       |
| Schizophrenia                                               | DOID 5419 (schizophrenia)                                                                              |
| Seizures                                                    | EMERGE-GIS-LOCAL 10118-9 (seizures)                                                                    |
| Stroke                                                      | MESH D020521 (stroke)                                                                                  |
| Tuberous sclerosis type 1                                   | EMERGE-GIS-LOCAL 10135-0 (tuberous sclerosis type 1)<br>MIM 191100 (tuberous sclerosis type 1)         |



Table S5. eMERGE III Clinical cohort description

| Site         | Total participants | eMERGESeq Cohort summary                                                            | Any phenotype enrichment? |
|--------------|--------------------|-------------------------------------------------------------------------------------|---------------------------|
| Vanderbilt   | 2,452              | biobank - prior PGx testing or interest in research                                 | N                         |
| UW/KPW       | 2,500              | biobank – Colorectal cancer/Polyps diagnosis or Asian ancestry                      | Y                         |
| Columbia     | 2,582              | biobank & prospective, some specific clinics and studies                            | Y                         |
| Mayo         | 3,025              | CRC/P & Hyperlipidemia cohorts                                                      | Y                         |
| Northwestern | 2,985              | prospective recruitment across clinics, some specialty                              | Y                         |
| Geisinger    | 2,500              | biobank - suspicious genotype                                                       | Y                         |
| Harvard      | 2,500              | biobank - unselected                                                                | N                         |
| CCHMC        | 3,000              | biobank & adolescent prospective                                                    | N                         |
| CHOP         | 2,976              | biobank - enriched for neuro phenotypes                                             | Y                         |
| Meharry      | 495                | Breast, prostate, colorectal, lung cancer or high risk for developing these cancers | Y                         |

Table S6. Demographic information for participants for each site in the eMERGEIII network

| Site                    | Sex   |        | Total | Caucasian | African American | Asian | Hispanic | Native American | Other | Unknown |
|-------------------------|-------|--------|-------|-----------|------------------|-------|----------|-----------------|-------|---------|
|                         | Male  | Female |       |           |                  |       |          |                 |       |         |
| UW/KPW                  | 984   | 1516   | 2500  | 1296      | 55               | 1008  | 40       | 50              | 27    | 24      |
| Geisinger               | 809   | 1691   | 2500  | 2350      | 68               | 9     | 59       | 4               | 7     | 3       |
| CCHMC <sup>a</sup>      | 1504  | 1496   | 3000  | 1773      | 1133             | 26    | 42       | 3               | 3     | 20      |
| Harvard                 | 1083  | 1417   | 2497  | 2043      | 147              | 75    | 137      | 0               | 0     | 98      |
| Northwestern            | 1148  | 1837   | 2985  | 2257      | 405              | 132   | 167      | 4               | 3     | 17      |
| Mayo <sup>b</sup>       | 1066  | 1497   | 3025  | 2391      | 14               | 19    | 114      | 2               | 0     | 485     |
| CHOP                    | 2045  | 931    | 2976  | 1533      | 1164             | 38    | 122      | 3               | 3     | 113     |
| Columbia                | 1163  | 1419   | 2582  | 829       | 205              | 109   | 358      | 4               | 22    | 1055    |
| Vanderbilt <sup>c</sup> | 1257  | 1105   | 2452  | 2156      | 102              | 24    | 26       | 4               | 0     | 140     |
| Meharry                 | 275   | 220    | 495   | 0         | 495              | 0     | 0        | 0               | 0     | 0       |
| Total                   | 10352 | 11890  | 22242 | 15845     | 2573             | 1377  | 967      | 53              | 20    | 1407    |

<sup>a</sup>1 individual had no sex information; <sup>b</sup>457 individuals had no sex information; <sup>c</sup>90 individuals had no sex information

Table S9. Participants with actionable PGx results from the eMERGE III cohort

| Drug                             | Gene    | Recommended adjustment to standard dosing or alternate drug use based on genotype |                   |                       |                     |                        |                      |                  |                               |                  |                         |
|----------------------------------|---------|-----------------------------------------------------------------------------------|-------------------|-----------------------|---------------------|------------------------|----------------------|------------------|-------------------------------|------------------|-------------------------|
|                                  |         | UW/KPW<br>(n=2500)                                                                | CCHMC<br>(n=3000) | Geisinger<br>(n=2500) | Harvard<br>(n=2500) | Vanderbilt<br>(n=2452) | Columbia<br>(n=2582) | Mayo<br>(n=3025) | North-<br>western<br>(n=2991) | CHOP<br>(n=2976) | Meharry<br>(n=495)      |
| Thiopurines                      | TPMT    | 177<br>(7%)                                                                       | 296<br>(10%)      | 223<br>(9%)           | 186<br>(7%)         | 241<br>(10%)           | 223<br>(9%)          | 308<br>(10%)     | 254<br>(9%)                   | 248<br>(8%)      | 52<br>(11%)             |
| Warfarin <sup>a</sup>            | CYP2C9/ | 1189<br>(48%)                                                                     | 740<br>(25%)      | 855<br>(34%)          | 944<br>(38%)        | 747<br>(30%)           | 856<br>(33%)         | 982<br>(32%)     | 962<br>(32%)                  | 673<br>(23%)     | 14<br>(3%)              |
| Phenytoin/<br>fosphenytoin       | VKORC1  | 579<br>(23%)                                                                      | 730<br>(24%)      | 858<br>(34%)          | 844<br>(34%)        | 849<br>(35%)           | 716<br>(28%)         | 993<br>(33%)     | 912<br>(31%)                  | 724<br>(24%)     | 40<br>(8%)              |
| PEG-IFN- $\alpha$ ,<br>Ribavirin | IFNL3   | 991<br>(40%)                                                                      | 1940<br>(65%)     | 1412<br>(56%)         | 1348<br>(54%)       | 0 <sup>b</sup> (n/a)   | 1512<br>(59%)        | 1651<br>(55%)    | 1692<br>(57%)                 | 1952<br>(66%)    | 0 <sup>b</sup><br>(n/a) |
| Fluoropyrimidines                | DPYD    | 35<br>(1%)                                                                        | 55<br>(2%)        | 57<br>(2%)            | 52<br>(2%)          | 0 <sup>b</sup> (n/a)   | 31<br>(1%)           | 51<br>(2%)       | 46<br>(2%)                    | 52<br>(2%)       | 0 <sup>b</sup><br>(n/a) |
| Simvastatin                      | SLCO1B1 | 589<br>(24%)                                                                      | 630<br>(21%)      | 706<br>(28%)          | 735<br>(29%)        | 653<br>(27%)           | 667<br>(26%)         | 876<br>(29%)     | 793<br>(27%)                  | 597<br>(20%)     | 30<br>(6%)              |
| Clopidogrel                      | CYP2C19 | 1012<br>(41%)                                                                     | 911<br>(30%)      | 702<br>(28%)          | 741<br>(30%)        | 699<br>(29%)           | 792<br>(31%)         | 890<br>(29%)     | 898<br>(30%)                  | 881<br>(30%)     | 172<br>(35%)            |
| Voriconazole                     |         | 661<br>(26%)                                                                      | 1018<br>(34%)     | 873<br>(35%)          | 850<br>(34%)        | 856<br>(35%)           | 781<br>(30%)         | 970<br>(32%)     | 1002<br>(34%)                 | 1030<br>(35%)    | 154<br>(31%)            |
| Tricyclic<br>antidepressants     |         | 661<br>(26%)                                                                      | 1018<br>(34%)     | 873<br>(35%)          | 850<br>(34%)        | 856<br>(35%)           | 781<br>(30%)         | 970<br>(32%)     | 1002<br>(34%)                 | 1030<br>(35%)    | 154<br>(31%)            |
| Citalopram,<br>Escitalopram      |         | 661<br>(26%)                                                                      | 1018<br>(34%)     | 873<br>(35%)          | 850<br>(34%)        | 856<br>(35%)           | 781<br>(30%)         | 970<br>(32%)     | 1002<br>(34%)                 | 1030<br>(35%)    | 154<br>(31%)            |
| Sertraline                       |         | 661<br>(26%)                                                                      | 1018<br>(34%)     | 873<br>(35%)          | 850<br>(34%)        | 856<br>(35%)           | 781<br>(30%)         | 970<br>(32%)     | 1002<br>(34%)                 | 1030<br>(35%)    | 154<br>(31%)            |

<sup>a</sup>Warfarin dosing algorithms use both genetic and nongenetic factors such as age, sex, smoking status etc. to predict appropriate dose. Follow up with physician is recommended for all individuals

<sup>b</sup>this site elected to not receive this PGx result

## **Supplemental methods:**

### **Proficiency Testing across clinical sequencing sites.**

Both BCM and Broad clinical labs are accredited by the College of American Pathologists (CAP) and are therefore required to perform biannual proficiency testing (PT) on every clinical test offered. There are several acceptable means to perform PT on a sequencing-based assay including enrollment in CAP's PT program. As part of the PT program CAP sends out reference samples with known events for the clinical lab to prepare and sequence and results are submitted to CAP for scoring. The eMERGEseq panel presented a unique opportunity for an alternate PT program - lab exchange. Since both laboratories are running the same clinical test, both could perform PT by sending previously tested clinical samples to the other lab. Results from end-to-end processing were compared for concordance. This approach has the added benefit of ensuring both laboratories remain technically harmonized throughout the duration of the project. For this program, BCM performs both the CAP PT program in conjunction with the alternate PT program described above.

Results of mid-2017 PT sample from BCM run at Broad: passing variant calls 100% concordant with BCM variants.

Results of mid-2017 PT sample from Broad run at BCM: passing variant calls 100% concordant with Broad variants.

# Sample clinical report (BCM)

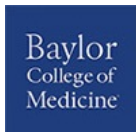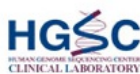

**HGSC Clinical Laboratory**  
 One Baylor Plaza, Houston TX, 77030  
 Phone: 713.798.6539 Fax: 713.798.5741  
[www.hgsc.bcm.edu](http://www.hgsc.bcm.edu) [questions@hgsc.bcm.edu](mailto:questions@hgsc.bcm.edu)

**Preliminary Report**

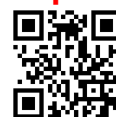

[goo.gl/cLdKB8](http://goo.gl/cLdKB8)

|                    |  |                          |            |
|--------------------|--|--------------------------|------------|
| Patient Name:      |  | Sample Collected Date:   |            |
| Patient ID:        |  | Sample Received Date:    | 03/16/2016 |
| Age:               |  | Report Date:             |            |
| DOB:               |  | Sample Type:             |            |
| Sex:               |  | Indication for Testing:  |            |
| Patient Sample ID: |  | Ordering Physician Name: |            |
| Accession #:       |  |                          |            |

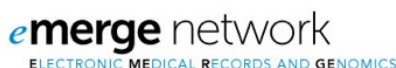

## Preliminary eMERGE-Seq Panel Sequencing Report

### HGSC-CL

This test interrogates the protein-coding and exon-splicing regions of 109 genes as well as 1551 single-nucleotide polymorphisms that may impact human health and disease. Clinical interpretation and reporting are provided for pathogenic and likely pathogenic variants for genes and single nucleotide polymorphisms as described in the methodology section.

#### **PATHOGENIC AND/OR LIKELY PATHOGENIC VARIANTS DETECTED**

A homozygous c.350G>A (p.R117H) pathogenic variant in the CFTR (NM\_000492.3) gene was detected in this individual. Defects in CFTR are the cause of cystic fibrosis (CF) [MIM 219700], an autosomal recessive common generalized disorder of the exocrine glands which impairs clearance of secretions in a variety of organs. It is characterized by the triad of chronic bronchopulmonary disease (with recurrent respiratory infections), pancreatic insufficiency (which leads to malabsorption and growth retardation), and elevated sweat electrolytes. Defects in CFTR are also the cause of congenital bilateral absence of the vas deferens (CBAVD) [MIM 277180], an important cause of sterility in men and could represent an incomplete form of cystic fibrosis, as the majority of men suffering from cystic fibrosis lack the vas deferens.

**Table 1: Details of Pathogenic and Likely Pathogenic Variants**

| Disease                                                                                     | Inh. | Gene | Position (NCBI 37)     | Variant             | Zyg.       | Notes                                                                                                                                                                                                                                                                                                                            | Interpretation |
|---------------------------------------------------------------------------------------------|------|------|------------------------|---------------------|------------|----------------------------------------------------------------------------------------------------------------------------------------------------------------------------------------------------------------------------------------------------------------------------------------------------------------------------------|----------------|
| Cystic fibrosis [MIM 219700]; Congenital bilateral absence of the vas deferens [MIM 277180] | AR   | CFTR | chr7<br>g.117171029G>A | c.350G>A<br>p.R117H | Homozygous | PMID 2344617, 23420618, 21228398, 21594800, 10103316, 24440181, 21507732, 22366207, 7506096, 22975760, 23951356, 12767731, 22658665, 20619026, 26324139, 23974870, 19880712, 23891399, 15246977, 26846474, 22332135, 20021716, 21520337, 23378603, 20797923, 20923678, 18778819, 19885835, 22572128, 23751316; rs78655421; [5T ] | Pathogenic     |

**Table 2: Details of Copy Number Variants:**

No CNVs found for this sample.

**Table 3: Details of Pharmacogenomic Variants**

Pharmacogenomics variants are returned for the following genes: CYP2C19, DPYD, INFL3, SLCO1B1, TPMT, CYP2C9/VKORC1. Star alleles are determined based on the variants detected by this assay. Star alleles may not be accurately defined due to the limitations of this assay which include: 1) The presence of additional variants defining functional and non functional alleles in a patient, not detected by this assay, and 2) the lack of ability to determine the phase of the variants when a star allele is defined by multiple variants. Additionally, undetected genetic and/or non genetic factors such as drug-drug interactions, may also impact the phenotype. This pharmacogenomic report is limited to CPIC level A alleles and drug recommendations. Additional (level B and lower) drugs may be metabolized by these

# Sample clinical report (BCM)

reported enzymes; and additional enzymes, not reported here, may affect the metabolism of a reported drug. Refer to the current recommendation for dosage guidelines. See Methodology for details.

| Gene             | Drug                     | Diplotype      | Phenotype                                                             | Recommendation                                                                                                                                                                                                                          |
|------------------|--------------------------|----------------|-----------------------------------------------------------------------|-----------------------------------------------------------------------------------------------------------------------------------------------------------------------------------------------------------------------------------------|
| CYP2C19          | clopidogrel              | *1/*1          | Normal metabolizer                                                    | <a href="https://cpicpgx.org/guidelines/guideline-for-clopidogrel-and-cyp2c19/">https://cpicpgx.org/guidelines/guideline-for-clopidogrel-and-cyp2c19/</a>                                                                               |
|                  | voriconazole             |                |                                                                       | <a href="https://cpicpgx.org/guidelines/guideline-for-voriconazole-and-cyp2c19/">https://cpicpgx.org/guidelines/guideline-for-voriconazole-and-cyp2c19/</a>                                                                             |
|                  | citalopram, escitalopram |                |                                                                       | <a href="https://cpicpgx.org/guidelines/guideline-for-selective-serotonin-reuptake-inhibitors-and-cyp2d6-and-cyp2c19/">https://cpicpgx.org/guidelines/guideline-for-selective-serotonin-reuptake-inhibitors-and-cyp2d6-and-cyp2c19/</a> |
|                  | amitriptyline            |                |                                                                       | <a href="https://cpicpgx.org/guidelines/guideline-for-tricyclic-antidepressants-and-cyp2d6-and-cyp2c19/">https://cpicpgx.org/guidelines/guideline-for-tricyclic-antidepressants-and-cyp2d6-and-cyp2c19/</a>                             |
| DPYD             | capecitabine             | *1/*1          | Normal DPD activity and "normal" risk for fluoropyrimidine toxicity   | <a href="https://cpicpgx.org/guidelines/guideline-for-fluoropyrimidines-and-dpyd/">https://cpicpgx.org/guidelines/guideline-for-fluoropyrimidines-and-dpyd/</a>                                                                         |
|                  | fluorouracil             |                |                                                                       |                                                                                                                                                                                                                                         |
|                  | tegafur                  |                |                                                                       |                                                                                                                                                                                                                                         |
| IFNL3            | peginterferon alfa-2a    | rs12979860 C/C | Favorable response genotype                                           | <a href="https://cpicpgx.org/guidelines/guideline-for-peg-interferon-alpha-based-regimens-and-ifnl3/">https://cpicpgx.org/guidelines/guideline-for-peg-interferon-alpha-based-regimens-and-ifnl3/</a>                                   |
|                  | peginterferon alfa-2b    |                |                                                                       |                                                                                                                                                                                                                                         |
|                  | ribavirin                |                |                                                                       |                                                                                                                                                                                                                                         |
| SLCO1B1          | simvastatin              | rs4149056 T/C  | Intermediate function, Intermediate simvastatin induced myopathy risk | <a href="https://cpicpgx.org/guidelines/guideline-for-simvastatin-and-slco1b1/">https://cpicpgx.org/guidelines/guideline-for-simvastatin-and-slco1b1/</a>                                                                               |
| TPMT             | azathioprine             | *1/*1          | High activity                                                         | <a href="https://cpicpgx.org/guidelines/guideline-for-thiopurines-and-tpmt/">https://cpicpgx.org/guidelines/guideline-for-thiopurines-and-tpmt/</a>                                                                                     |
|                  | mercaptopurine           |                |                                                                       |                                                                                                                                                                                                                                         |
|                  | thioguanine              |                |                                                                       |                                                                                                                                                                                                                                         |
| CYP2C9<br>VKORC1 | warfarin                 | *1/*3<br>T/T   | Intermediate metabolizer                                              | <a href="https://cpicpgx.org/guidelines/guideline-for-warfarin-and-cyp2c9-and-vkorc1/">https://cpicpgx.org/guidelines/guideline-for-warfarin-and-cyp2c9-and-vkorc1/</a>                                                                 |

## Interpretation of Pharmacogenomic Variants:

This individual is homozygous for the wild type allele of the CYP2C19 gene. Based on the genotype result, this patient is predicted to have a CYP2C19 normal metabolizer phenotype. This genotype information can be used by patients and clinicians as part of the shared decision-making process for several drugs metabolized by CYP2C19 including clopidogrel, voriconazole, amitriptyline, citalopram and escitalopram. For clopidogrel, individuals with this diplotype are expected to have normal platelet inhibition and normal residual platelet aggregation in response to clopidogrel. Label recommended dosage and administration are recommended. Refer to current guidelines for dosage and recommendations at <https://cpicpgx.org/guidelines/guideline-for-clopidogrel-and-cyp2c19/>. For voriconazole, normal voriconazole metabolism is expected in individuals with this genotype. Initiate therapy with recommended standard of care dosing. Refer to current guidelines for dosage and recommendations at <https://cpicpgx.org/guidelines/guideline-for-voriconazole-and-cyp2c19/>. For citalopram and escitalopram, initiate therapy with recommended starting dose. Refer to current guidelines for dosage and recommendations at <https://cpicpgx.org/guidelines/guideline-for-selective-serotonin-reuptake-inhibitors-and-cyp2d6-and-cyp2c19/>. For amitriptyline, initiate therapy with recommended starting dose. Refer to current guidelines for dosage and recommendations at <https://cpicpgx.org/guidelines/guideline-for-tricyclic-antidepressants-and-cyp2d6-and-cyp2c19/>. For citalopram, escitalopram and amitriptyline, if CYP2D6 genotyping is available, refer to the current guidelines for dosing recommendations.

This individual is homozygous for the functional allele of the DPYD gene. This genotype information can be used by patients and clinicians as part of the shared decision-making process for fluoropyrimidines (capecitabine, fluorouracil, tegafur). Based on the genotype result, this patient is predicted to have a normal DPD activity phenotype. Individuals with this diplotype are expected to have "normal" risk for fluoropyrimidine toxicity. Recommendations include the use of label recommended dosage and administration. Refer to current guidelines for dosage and recommendations at <https://cpicpgx.org/guidelines/guideline-for-fluoropyrimidines-and-dpyd/>.

This individual is homozygous for the rs12979860 C/C allele in the IFNL3 gene. This variant is the strongest baseline predictor of response to peginterferon alfa and ribavirin therapy in previously untreated patients and can be used by patients and clinicians as part of the shared decision-making process for initiating treatment for hepatitis C virus infection. Based on the genotype result, this patient is predicted to have an increased likelihood of response (higher sustained virologic response rate) to peginterferon alfa and ribavirin therapy as compared with patients with unfavorable response genotype. Refer to current guidelines for dosage and recommendations at <https://cpicpgx.org/guidelines/guideline-for-peg-interferon-alpha-based-regimens-and-ifnl3/>.

This individual is heterozygous for the rs4149056 T/C allele in the SLCO1B1 gene. This genotype information can be used by patients and clinicians as part of the shared decision-making process for simvastatin and other drugs affected by SLCO1B1. Based on the genotype result, this patient is predicted to have intermediate SLCO1B1 function. This patient may be at risk for an adverse response to medications that are affected by SLCO1B1. To avoid an untoward drug response, dose adjustments may be necessary for medications affected by SLCO1B1. If simvastatin is prescribed to a patient with intermediate SLCO1B1 function, there is an increased risk for developing simvastatin-associated myopathy; such patients may need a lower starting dose of simvastatin or an alternate statin agent. Refer to current guidelines for dosage and recommendations at <https://cpicpgx.org/guidelines/guideline-for-simvastatin-and-slco1b1/>.

This individual is homozygous for the normal high activity allele of the TPMT gene. Decreased TPMT gene activity is associated with toxicity and myelosuppression in response to thiopurines, and this genotype information can be used by patients and clinicians as part of the shared decision-making process for initiating treatment. Based on the genotype result, this patient is predicted to have normal TPMT function. Individuals with this diplotype are expected to have a normal response to mercaptopurine, azathioprine and thioguanine. A normal dose of thiopurine and adjustment following the disease-specific guidelines is recommended. Refer to current guidelines for dosage and recommendations for each specific thiopurine drug at <https://cpicpgx.org/guidelines/guideline-for-thiopurines-and-tpmt/>.

This individual is heterozygous for the low function allele in the CYP2C9 gene. Based on the genotype result, this patient is predicted to have intermediate CYP2C9 function. This individual is also homozygous for the variant allele for the VKORC1 gene. Expression level of the VKORC1 gene is associated with warfarin sensitivity. Based on the genotype result, this patient is predicted to have high sensitivity to warfarin.

# Sample clinical report (BCM)

## Comments & Recommendations:

It is recommended that correlation of these findings with the clinical phenotype be performed. Genetic counseling for the patient and at-risk family members is recommended.

This is a preliminary report because the variant has not yet been confirmed by Sanger sequencing.

## Gene Coverage:

All genes have 100% of targeted bases sequenced to redundant coverage of 20x or greater with the following exceptions: APOB (99.39%), CACNA1B (96.45%), COL5A1 (98.03%), GRM5 (99.92%), KCNQ1 (94.28%), PKP2 (98.76%), PRKAG2 (99.83%), RYR1 (98.69%), TGFBR1 (93.56%). Further information, including specific coverage for this patient's sample, is available in the ExCID report.

## Methodology:

1. eMERGE-Seq Version 2 NGS Panel: for the paired-end pre-capture library procedure, genome DNA is fragmented by sonicating genome DNA and ligating to the Illumina multiplexing PE adapters (reference 1). The adapter-ligated DNA is then PCR amplified using primers with sequencing barcodes (indexes). For target enrichment capture procedure, the pre-capture library is enriched by hybridizing to biotin labeled in-solution probes (reference 2) at 56°C for 16 - 19 hours. For massively parallel sequencing, the post-capture library DNA is subjected to sequence analysis on Illumina HiSeq platform for 100 bp paired-end reads. The following quality control metrics of the sequencing data are generally achieved: >70% of reads aligned to target, >99% target base covered at >20X, >98% target base covered at >40X, average coverage of target bases >200X. SNP concordance to SNPTrace genotype array: >99%. This test may not provide detection of certain genes or portions of certain genes due to local sequence characteristics or the presence of closely related pseudogenes. Gross deletions or duplications, changes from repetitive sequences may not be accurately identified by this methodology. Genomic rearrangements cannot be detected by this assay.

2. As a quality control measure, the individual's DNA is also analyzed by a SNP-array (Fluidigm SNPTrace panel (reference 3) ). The SNP data are compared with the NGS panel data to ensure correct sample identification and to assess sequencing quality.

3. Data are analyzed by the Mercury 3.4 (reference 4) pipeline. The output data from Illumina HiSeq are converted from bcl file to FastQ file by Illumina bcl2fastq 1.8.3 software, and mapped to the hg19 human genome reference by the BWA program (reference 5). The variant calls are performed using Atlas-SNP and Atlas-indel developed in-house by BCM HGSC. Copy number variants were detected using Atlas-pcnv v0, developed in-house by the BCM HGSC. Variant annotations are performed using the Cassandra tool, developed in-house. Neptune version \$VERSION was used to match variants against curated variants in the VIP database version [/hgsccl/next-gen/neptune/vip/vip.2016-11-07] and generate this report.\*\*

4. The variants were interpreted according to ACMG guidelines (reference 6) and patient phenotypes. Synonymous variants, intronic variants not affecting splicing site, and common benign variants are excluded from interpretation unless they were previously reported as pathogenic variants. Reviewed variants are added to the VIP database for inclusion on future reports. It should be noted that the interpretation of the data is based on our current understanding of genes and variants at the time of reporting.

Clinical interpretation and reporting are provided for pathogenic and likely pathogenic variants as requested by BMGL for the following 68 medically actionable genes: ACTA2, ACTC1, APC, APOB, BMPR1A, BRCA1, BRCA2, CACNA1A, CACNA1S, COL3A1, COL5A1, DSC2, DSG2, DSP, FBN1, GLA, HNF1A, HNF1B, KCNE1, KCNH2, KCNJ2, KCNQ1, LDLR, LMNA, MEN1, MLH1, MSH2, MSH6, MUTYH, MYBPC3, MYH11, MYH7, MYL2, MYL3, MYLK, NF2, OTC, PALB2, PCSK9, PKP2, PMS2, POLD1, POLE, PRKAG2, PTEN, RB1, RET, RYR1, RYR2, SCN5A, SDHAF2, SDHB, SDHC, SDHD, SMAD3, SMAD4, STK11, TGFBR1, TGFBR2, TMEM43, TNNT3, TNNT2, TP53, TPM1, TSC1, TSC2, VHL, WT1, the following non medically actionable genes: ANK2, ATM, ATP1A2, BMPR2, CACNA1C, CFH, CFTR, CHEK2, FLG, MC4R, MTHFR, NTRK1, SCN1A, SCN9A, SERPINA1, SLC2A10, TCF4, TCIRG1, TTR, TYK2, UMOD, VDR, the following medically actionable SNPs: rs77931234, rs387906225, rs79761867, rs386834233, rs113993962, rs397509431, rs6467, rs6025, rs80338898, rs1801175, rs1800562, rs28940579, rs61752717, rs193922376; and non medically actionable SNPs: rs151344623, rs76151636, rs111033258, rs786205104, rs786205103, rs147394623, rs121964990, rs121965064, rs121965063, rs104886456, rs201227603, rs74315447, rs61755320, rs724159981. For autosomal recessive disorders, only homozygous or biallelic variants will be returned. Variants in exon 3 of the FLG gene are not reported.

5. Variants related to patient phenotypes are confirmed by Sanger sequencing if the variant has been observed and confirmed fewer than 5 times by our laboratory or the Baylor Genetics Laboratory. Sanger confirmation is noted in the 'Notes' section of the tables if performed.

6. For the pharmacogenomic variants, the star alleles are determined based on the variants detected by this assay. Alleles reported for TPMT are limited to \*1, \*2, \*3A, \*3B, \*3C and \*4. Alleles reported for CYP2C19 are limited to \*1, \*2, \*4A, \*4B, \*5, \*6, \*7, \*8, \*17. If reported, alleles for DPD are limited to \*1, \*2A, \*13 and rs67376798. Alleles reported for CYP2C9 are limited to \*1, \*2 and \*3; and rs9923231 for VKORC1. Additional rare star alleles have been reported with reduced or no function for TPMT, CYP2C19 and DPD; however, the variants defining these additional star alleles are not detected with this assay. For SLC01B1, this assay only detects rs4149056. The minor C allele at rs4149056 defines the SLC01B1\*5 (rs4149056 alone) but also tags the \*15 and \*17 alleles. Thus a \*5 allele may represent a \*15 or \*17 allele. However, the magnitude of the phenotypic effect is similar for \*5, \*15, and \*17 alleles.

\*\* The VIP variant database was developed in conjunction with Baylor Genetics and the Partners Healthcare Laboratory for Molecular Medicine.

# Sample clinical report (Partners/Broad)

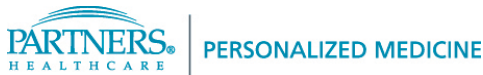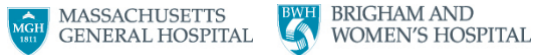

Unit Number(s):

## Laboratory for Molecular Medicine

65 Landsdowne Street, Cambridge MA 02139

Phone: (617) 768-8500 Fax: (617) 768-8513

[www.partners.org/personalizedmedicine/lmm](http://www.partners.org/personalizedmedicine/lmm)

Lab Accession: **PM-16-A07001**

Patient Name: **68282000, 10038000**

Birth Date: **1/1/1800**

Age Sex: **215 Year old Female**

Page 1 of 3

## MOLECULAR DIAGNOSTICS REPORT

|                              |                                          |                            |                              |
|------------------------------|------------------------------------------|----------------------------|------------------------------|
| <b>Specimen Type:</b>        | DNA, Isolated - Blood, Peripheral (edit) | <b>Received Date:</b>      | 9/1/2016                     |
| <b>Related Accession(s):</b> |                                          | <b>Referring Facility:</b> | HARVARD                      |
| <b>Referring Physician:</b>  | EMERGE-CLINIC-TEST                       | <b>Referring Fac. MRN:</b> |                              |
| <b>Copies To:</b>            | GENEINSIGHT                              | <b>Lab Control Number:</b> | 10038000_68282000-0_SM-B3ZZZ |
|                              | EMERGE-HUB GENEINSIGHT                   | <b>Family Number:</b>      | FAB123                       |

**TEST DESCRIPTION** - Copy Number Variation Analysis  
Sequence Confirmation Test eMERGE III Sequencing Panel

**TEST PERFORMED** - CNV-a; SeqConV2; EMERGE-pnlC

**INDICATION FOR TEST** - Not selected for trait

## RESULTS

### DNA VARIANTS:

Heterozygous c.338C>A (p.Ser113X), Exon 4, PMS2, Pathogenic

### INTERPRETATION:

**Positive.** DNA sequencing of the coding regions and splice sites of 97 genes (see methodology section below) identified the variants listed above. Copy number analysis using NGS could not be completed because data did not meet quality standards for CNV detection. For a list of exons that are incompletely covered please see "Additional notes and disclaimers" section below.

### SUMMARY:

This individual carries a Pathogenic variant in the PMS2 gene. The available information on this variant is described below. Disease-causing variants in the PMS2 gene are strongly associated with Lynch syndrome and this individual may be at risk for developing colorectal cancer / polyps.

### ADDITIONAL NOTES AND DISCLAIMERS:

Disease penetrance and severity can vary due to modifier genes and/or environmental factors. The significance of a variant should therefore be interpreted in the context of the individual's clinical manifestations

### DETAILED VARIANT INTERPRETATIONS:

p.Ser113X, c.338C>A (PMS2; NM\_000535.5; Chr7g.6043336G>T; GRCh37):

The p.Ser113X variant in PMS2 has not been previously reported in individuals with Lynch syndrome and was absent from large population studies. This nonsense variant



# Sample clinical report (Partners/Broad)

Laboratory for Molecular Medicine  
Partners HealthCare Personalized Medicine

Accession: **PM-16-A07001**  
Patient Name: **68282000, 10038000**

Page 2 of 3

## MOLECULAR DIAGNOSTICS REPORT

---

leads to a premature termination codon at position 113, which is predicted to lead to a truncated or absent protein. Heterozygous loss of function of the PMS2 gene is an established disease mechanism in Lynch syndrome (<http://www.ncbi.nlm.nih.gov/books/NBK1211/>). In summary, this variant meets our criteria to be classified as pathogenic for Lynch syndrome (<http://www.partners.org/personalizedmedicine/LMM>) based upon predicted impact to the protein and absence in controls.

### RECOMMENDATION:

Genetic counseling is recommended for this individual and their relatives. Familial variant testing is available for other relatives if desired. For assistance in locating genetic counseling services or disease specialists, please call the laboratory at 617-768-8500 or email at [LMM@partners.org](mailto:LMM@partners.org).

Please note that variant classifications may change over time if more information becomes available. Please contact us at 617-768-8500 or [LMM@partners.org](mailto:LMM@partners.org).

### TEST INFORMATION

#### BACKGROUND:

The eMERGE (electronic MEDical Records and GENomics) network combines DNA biorepositories with electronic health record (EHR) systems for large-scale discovery and clinical implementation research in genomic medicine. A main goal is the return of genomic testing results to patients in a clinical care setting. In phase III, participating sites are sequencing 109 clinically relevant genes in ~25,000 participants using a custom next generation sequencing panel.

#### METHODOLOGY:

Test content (target region): This test includes 109 genes (including the ACMG56 genes; PMID: 23788249, and additional genomic positions for known variants. For reference sequences exons/positions covered see <http://personalizedmedicine.partners.org/Laboratory-For-Molecular-Medicine/>).

Note that this test may not detect variants in regions with difficult sequence contexts (e.g. high or low GC content) and is generally not designed to detect deep intronic variants as well as variants in the 5' and 3'UTR. Regions with high sequence homology are only included in this test if a unique Sanger sequencing assay can be designed to rule out false positive calls.

Sample preparation, sequencing, variant calling and confirmation: This test is performed by next generation sequencing using sonicated genomic DNA (Covaris) followed by target enrichment (Illumina Rapid Capture Custom Kit), Illumina HiSeq sequencing (76 bp paired-end reads) and alignment/variant calling (BWA/GATK). A custom script is used to generate calls for the individual genomic positions. Sample identity is confirmed by comparing NGS derived genotypes of a custom set of SNPs to results generated for the same specimen using a fingerprinting genotype array. Samples with  $\leq 95\%$  of the target region covered at  $\geq 20X$  are failed and repeated. Copy number variants (CNVs) of  $\geq 3$  exons are detected by an in-house developed tool (VisCap, PMID: 26681316). This assay is 99.33% sensitive to detect single nucleotide variants (95% CI = 96.30-99.88%), 100% sensitive to detect indels (95% CI = 79.61-100.00%) and 100% sensitive to detect CNVs (n=4). All variants included on this report are confirmed (SNVs and indels: Sanger sequencing, CNVs: ddPCR).

# Sample clinical report (Partners/Broad)

Laboratory for Molecular Medicine  
Partners HealthCare Personalized Medicine

Accession: **PM-16-A07001**  
Patient Name: **68282000, 10038000**

## MOLECULAR DIAGNOSTICS REPORT

---

Variant annotation and filtration: All variants within the coding sequence of the included genes (default: exons +/- 5 bp) are subjected to the following process: Variant annotations are derived from ExAC (vs 0.3), ClinVar (April 2016 release), HGMD (2016.1), 1000 Genomes (Phase 3), Alamut Batch (vs 1.4.4), (dbnsfp vs 3.1), and LMM's GeneInsight knowledge base (vs 5.3.2). The following variant types are further analyzed: a) Loss of function variants with a minor allele frequency (MAF)<1%, b) Variants previously classified as pathogenic or likely pathogenic regardless of MAF, c) ClinVar pathogenic or likely pathogenic and HGMD DM variants with a MAF<5%.

Variant interpretation and clinical reporting: Variants assessment is based on in-house developed expert criteria and the most recent ACMG classification framework (PMID: 25741868) with disease and gene-specific modifications when applicable. Please note that variant classifications can change over time. Reporting is restricted to pathogenic and likely pathogenic variants in a subset of eMERGE network genes and variants consisting of 62 genes and 1 variant in an additional gene: ACTA2, ACTC1, APC, APOB, BRCA1, BRCA2, CACNA1C, CACNA1S, COL3A1, DSC2, DSG2, DSP, FBN1, GLA, HNF1A, KCNE1, KCNH2, KCNJ2, KCNQ1, LDLR, LMNA, MEN1, MLH1, MSH2, MSH6, MUTYH, MYBPC3, MYH11, MYH7, MYL2, MYL3, MYLK, NF2, OTC, PCSK9, PKP2, PMS2, PRKAG2, PTEN, RB1, RET, RYR1, RYR2, SCN5A, SDHAF2, SDHB, SDHC, SDHD, SMAD3, SMAD4, STK11, TGFBR1, TGFBR2, TMEM43, TNNI3, TNNT2, TP53, TPM1, TSC1, TSC2, VHL, WT1 and HFE (rs1800562). Carrier status for autosomal recessive conditions will not be reported.

This test was developed and its performance characteristics determined by the Laboratory for Molecular Medicine at Partners HealthCare Personalized Medicine (LMM, 65 Landsdowne St, Cambridge, MA 02139; 617-768-8500; CLIA#22D1005307). It has not been cleared or approved by the U.S. Food and Drug Administration (FDA). The FDA has determined that such clearance or approval is not necessary.

### REFERENCES:

Hendriks YM, Jagmohan-Changur S, van der Klift HM, Morreau H, van Puijenbroek M, Tops C, van Os T, Wagner A, Ausems MG, Gomez E, Breuning MH, Bröcker-Vriends AH, Vasen HF, Wijnen JT. 2006. Heterozygous mutations in PMS2 cause hereditary nonpolyposis colorectal carcinoma (Lynch syndrome). *Gastroenterology*. 130(2):312-22.

REPORT by Matthew Lebo Ph.D., on Friday September 09, 2016 at 04:22:23PM

Final Diagnosis by **Matthew Lebo Ph.D.**, Electronically signed on Monday September 12, 2016 at 10:56:03AM
